# Supplementary material for: Highly stable quantum dots with silica–poly(EGDMA-co-MAA) synergistic protection and the preliminary application in immunoassay
Source: Royal Society of Chemistry journal article supplement (doi:10.1039/c2tb00162d), 2013-01-01
Supplement: c2tb00162d.pdf [file c2tb00162d.pdf]

## Supplementary Information

Highly stable quantum dots with silica-Poly(EGDMA-co-MAA)  
synergistic protection and the preliminary application in immunoassay

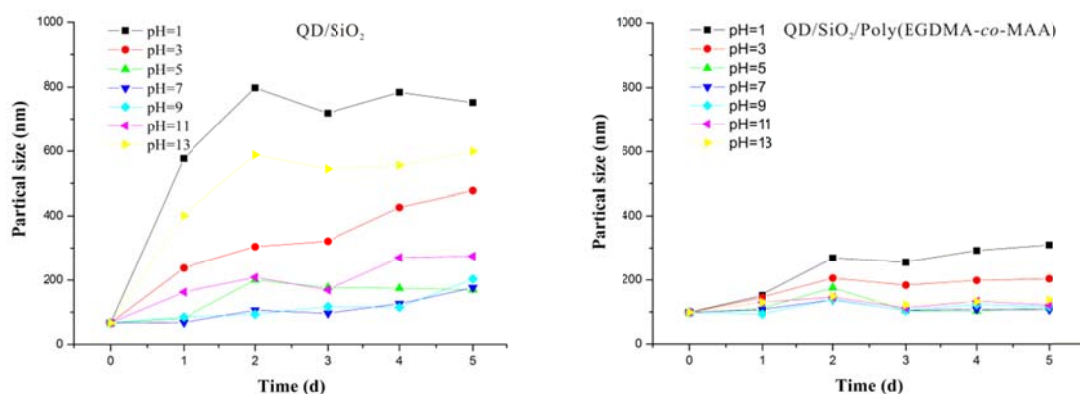

Fig. S1 Changes in particle size of (A) QD/SiO<sub>2</sub> and (B) QD/SiO<sub>2</sub>/Poly(EGDMA-co-MAA) treated with pH=1, 3, 5, 7, 9, 11, 13 buffers along with time.

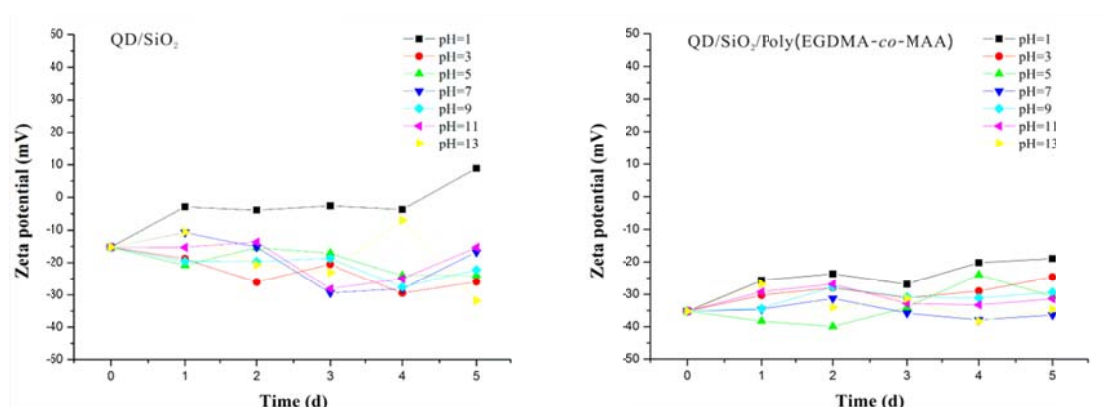

Fig. S2 Changes in surface charge of (A) QD/SiO<sub>2</sub> and (B) QD/SiO<sub>2</sub>/Poly(EGDMA-co-MAA) treated with pH=1, 3, 5, 7, 9, 11, 13 buffers along with time.

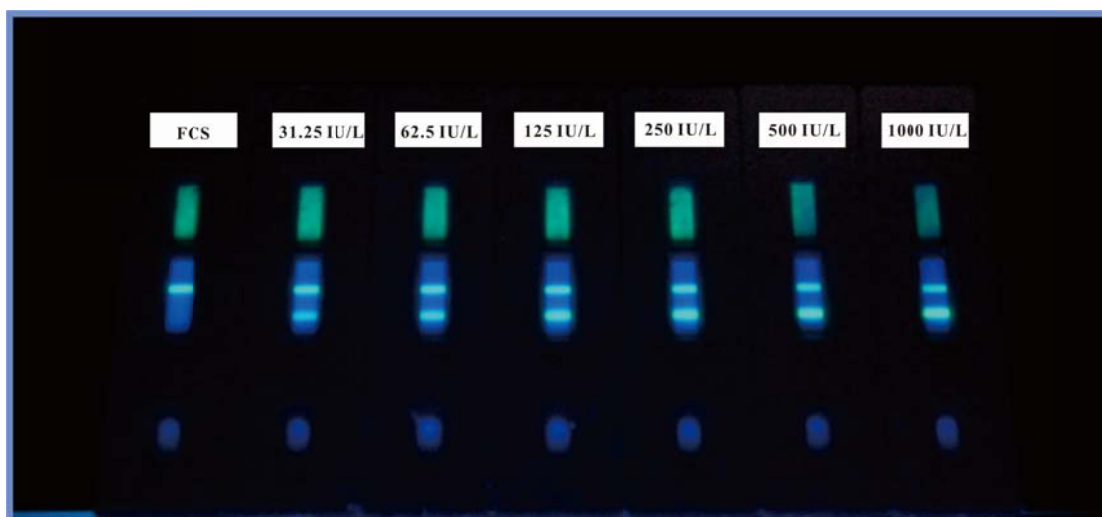

Fig. S3 Image QD/SiO<sub>2</sub>/Poly(EGDMA-co-MAA)-based ICTS after detecting of HCG at various concentrations (from left to right, the concentration of HCG antigen was 0, 31.25, 62.5, 125, 250, 500 and 1000 IU L<sup>-1</sup>, respectively).
